# Supplementary material
Source: publisher figshare collection journal article supplement (https://wiley.figshare.com/articles/dataset/_/3566508)
Supplement: Supplementary file 1 [file 1 › appendix-C.htm]

Ecological Archives M078-021-A3


### *Ecological Archives* M078-021-A3

### **Nikolay Strigul, Denis Pristinski, Drew Purves, Jonathan Dushoff, and Stephen Pacala. 2008. Scaling from trees to forests: tractable macroscopic equations for forest dynamics. *Ecological Monographs* 78:523–545.**

Appendix C. Self-thinning in the simplest case: derivation of the Law of Constant Final Yield and Yoda's Law. Click here for a PDF file of the appendix.

---


[Back to M078-021]
